# Supplementary material for: A Mysterious World Revealed: Larval-Adult Matching of Deep-Sea Shrimps from the Gulf of Mexico
Source: MDPI journal article supplement (doi:10.3390/d13100457), 2021-09-23
Supplement: s1 [file s1]

**Table S1.** Taxonomy, voucher catalog numbers, localities and GenBank (GB) accession numbers for gene sequences used in the study. An “N/A” = not available. Gulf of Mexico = GOM), Florida Straits = FL Straits, and Mediterranean = Mediterr.

| Taxon                                                | GenBank numbers |          |          |          |
|------------------------------------------------------|-----------------|----------|----------|----------|
|                                                      | Voucher         | 16S      | CO1      | Locality |
| <b>ORDER DECAPODA</b> Latreille, 1816                |                 |          |          |          |
| <i>Infraorder Caridea</i> Dana, 1852                 |                 |          |          |          |
| <u>Family Acantheephyridae</u> Spence Bate, 1888     |                 |          |          |          |
| <b><i>Acantheephyra</i></b> A. Milne-Edwards, 1881   |                 |          |          |          |
| <i>Acantheephyra purpurea</i> A. Milne-Edwards, 1881 | HBG4167         | MF197188 | MF197244 | GOM      |
| <b><i>Heterogenys</i></b> Chace, 1986                |                 |          |          |          |
| <i>Heterogenys microphthalmal</i> (Smith, 1885)      | HBG937          | KP075898 | KP076183 | Taiwan   |
| <b><i>Ephyrina</i></b> Smith, 1885                   |                 |          |          |          |
| <i>Ephyrina benedicti</i> Smith, 1885                | HBG4605         | MF197196 | MF197248 | GOM      |
| <i>Ephyrina ombango</i> Crosnier & Forest, 1973      | HBG7902         | MZ678942 | N/A      | GOM      |
| <i>Ephyrina ombango</i> Crosnier & Forest, 1973      | HBG7275         | MH542977 | MH572594 | GOM      |
| <b><i>Meningodora</i></b> Smith, 1882                |                 |          |          |          |
| <i>Meningodora mollis</i> Smith, 1882                | HBG7264         | MH542973 | MH572584 | GOM      |
| <i>Meningodora longisulca</i> Kikuchi, 1985          | HBG4678         | MF197203 | N/A      | GOM      |
| <i>Meningodora longisulca</i> Kikuchi, 1985          | HBG7844         | MZ678940 | N/A      | GOM      |
| <i>Meningodora compsa</i> (Chace, 1940)              | HBG7260         | MT340786 | MT447403 | GOM      |
| <i>Meningodora vesca</i> (Smith, 1886)               | HBG7939         | MZ678949 | MZ703135 | GOM      |
| <i>Meningodora vesca</i> (Smith, 1886)               | HBG7999         | MZ678952 | N/A      | GOM      |
| <i>Meningodora vesca</i> (Smith, 1886)               | HBG6950         | MH542968 | N/A      | GOM      |
| <b><i>Notostomus</i></b> A. Milne-Edwards, 1881      |                 |          |          |          |
| <i>Notostomus elegans</i> A. Milne-Edwards, 1881     | HBG4226         | MF197200 | N/A      | GOM      |
| <i>Notostomus gibbosus</i> A. Milne-Edwards, 1881    | HBG4220         | MF197201 | MH572685 | GOM      |
| <u>Family Alvinocarididae</u> Christoffersen, 1986   |                 |          |          |          |
| <b><i>Alvinocaris</i></b> Williams & Chace, 1982     |                 |          |          |          |
| <i>Alvinocaris stactophila</i> Williams, 1988        | AsJSL-1         | N/A      | AF125410 | GOM      |
| <i>Alvinocaris stactophila</i> Williams, 1988        | HBG8811         | MZ678954 | MZ681542 | GOM      |
| <i>Alvinocaris stactophila</i> Williams, 1988        | HBG8848         | MZ680358 | N/A      | GOM      |

Family Disciadidae Rathbun, 1902

***Lucaya*** Chace 1939

|                                    |         |          |     |     |
|------------------------------------|---------|----------|-----|-----|
| <i>Lucaya bigelowi</i> Chace, 1939 | HBG4627 | MF197213 | N/A | GOM |
|------------------------------------|---------|----------|-----|-----|

Family Eugonatonotidae Chace, 1937

*Eugonatonotus* Schmitt, 1926

|                                                       |                   |          |          |          |
|-------------------------------------------------------|-------------------|----------|----------|----------|
| <i>Eugonatonotus crassus</i> (A. Milne-Edwards, 1881) | MNHN-IU-2012-1024 | KP725521 | KP759400 | Atlantic |
|-------------------------------------------------------|-------------------|----------|----------|----------|

|                                                      |         |          |     |     |
|------------------------------------------------------|---------|----------|-----|-----|
| <i>Eugonatonotus crasus</i> (A. Milne-Edwards, 1881) | HBG6822 | MZ678642 | N/A | GOM |
|------------------------------------------------------|---------|----------|-----|-----|

Family Nematocarcinidae Smith, 1884

***Nematocarcinus*** A. Milne-Edwards, 1881

|                                             |          |     |          |         |
|---------------------------------------------|----------|-----|----------|---------|
| <i>Nematocarcinus ensifer</i> (Smith, 1882) | Ne2688-2 | N/A | AF125435 | Pacific |
|---------------------------------------------|----------|-----|----------|---------|

|                                                     |        |          |     |     |
|-----------------------------------------------------|--------|----------|-----|-----|
| <i>Nematocarcinus cursor</i> A. Milne-Edwards, 1881 | HBG554 | KP075928 | N/A | GOM |
|-----------------------------------------------------|--------|----------|-----|-----|

|                                                     |         |          |     |            |
|-----------------------------------------------------|---------|----------|-----|------------|
| <i>Nematocarcinus cursor</i> A. Milne-Edwards, 1881 | HBG6202 | MZ678637 | N/A | FL Straits |
|-----------------------------------------------------|---------|----------|-----|------------|

|                                                        |         |          |     |     |
|--------------------------------------------------------|---------|----------|-----|-----|
| <i>Nematocarcinus rotundus</i> Crosnier & Forest, 1973 | HBG8000 | MZ678951 | N/A | GOM |
|--------------------------------------------------------|---------|----------|-----|-----|

|                                                        |         |          |     |     |
|--------------------------------------------------------|---------|----------|-----|-----|
| <i>Nematocarcinus rotundus</i> Crosnier & Forest, 1973 | HBG6134 | MZ678245 | N/A | GOM |
|--------------------------------------------------------|---------|----------|-----|-----|

|                                                        |         |          |     |     |
|--------------------------------------------------------|---------|----------|-----|-----|
| <i>Nematocarcinus rotundus</i> Crosnier & Forest, 1973 | HBG3795 | MZ702778 | N/A | GOM |
|--------------------------------------------------------|---------|----------|-----|-----|

|                                                        |         |          |     |     |
|--------------------------------------------------------|---------|----------|-----|-----|
| <i>Nematocarcinus rotundus</i> Crosnier & Forest, 1973 | HBG7555 | MZ702557 | N/A | GOM |
|--------------------------------------------------------|---------|----------|-----|-----|

|                                                        |         |          |          |     |
|--------------------------------------------------------|---------|----------|----------|-----|
| <i>Nematocarcinus rotundus</i> Crosnier & Forest, 1973 | HBG7996 | MZ678948 | MZ681540 | GOM |
|--------------------------------------------------------|---------|----------|----------|-----|

|                                                        |         |     |          |     |
|--------------------------------------------------------|---------|-----|----------|-----|
| <i>Nematocarcinus rotundus</i> Crosnier & Forest, 1973 | HBG7997 | N/A | MZ681540 | GOM |
|--------------------------------------------------------|---------|-----|----------|-----|

Family Oplophoridae Dana, 1852a

***Janicella*** Chace, 1986

|                                                      |         |     |          |     |
|------------------------------------------------------|---------|-----|----------|-----|
| <i>Janicella spinicauda</i> (A. Milne-Edwards, 1883) | HBG7002 | N/A | MT444884 | GOM |
|------------------------------------------------------|---------|-----|----------|-----|

***Oplophorus*** H. Milne Edwards, 1837 [in H. Milne Edwards, 1834–1840]

|                                                         |         |          |          |     |
|---------------------------------------------------------|---------|----------|----------|-----|
| <i>Oplophorus gracilirostris</i> A. Milne-Edwards, 1881 | HBG4222 | MF197206 | MF197251 | GOM |
|---------------------------------------------------------|---------|----------|----------|-----|

***Systellaspis*** Spence Bate, 1888

|                                                      |         |          |          |     |
|------------------------------------------------------|---------|----------|----------|-----|
| <i>Systellaspis braueri</i> (Balss, 1914)            | HBG5026 | MF197208 | MF197255 | GOM |
| <i>Systellaspis braueri</i> (Balss, 1914)            | HBG6823 | MZ678726 | N/A      | GOM |
| <i>Systellaspis debilis</i> (A. Milne-Edwards, 1881) | HBG3414 | MH542906 | MH572640 | GOM |

Family Pandalidae Haworth, 1825

***Heterocarpus*** A. Milne-Edwards, 1881

|                                                    |         |          |          |     |
|----------------------------------------------------|---------|----------|----------|-----|
| <i>Heterocarpus oryx</i> A. Milne-Edwards, 1881    | HBG3746 | MZ710045 | N/A      | GOM |
| <i>Heterocarpus ensifer</i> A. Milne-Edwards, 1881 | HBG6844 | MZ678760 | MZ681493 | GOM |
| <i>Heterocarpus ensifer</i> A. Milne-Edwards, 1881 | HBG6113 | MF197212 | MH572672 | GOM |

***Plesionika*** Spence Bate, 1888

|                                                                   |              |          |          |          |
|-------------------------------------------------------------------|--------------|----------|----------|----------|
| <i>Plesionika acanthonotus</i> (Smith, 1882)                      | C70          | N/A      | MG850988 | Atlantic |
| <i>Plesionika holthuisi</i> Crosnier & Forest, 1968)              | ULLZ 7953    | EU868703 | N/A      | GOM      |
| <i>Plesionika longipes</i> (A. Milne-Edwards, 1881)               | ULLZ 8363    | EU868704 | N/A      | GOM      |
| <i>Plesionika longicauda</i> (Rathbun, 1901)                      | CCDB5778     | MF490227 | N/A      | Atlantic |
| <i>Plesionika martia</i> (A. Milne-Edwards, 1883)                 | FCFOPC041-47 | JN412688 | JQ306281 | Atlantic |
| <i>Plesionika edwardsii</i> (J.F. Brandt in von Middendorf, 1851) | JSDME70      | N/A      | JN412726 | Atlantic |
| <i>Plesionika edwardsii</i> (J.F. Brandt in von Middendorf, 1851) | JSDME074-08  | JN412684 | N/A      | Atlantic |
| <i>Plesionika edwardsi</i> (J.F. Brandt in von Middendorf, 1851)  | HBG7564      | MZ678941 | N/A      | GOM      |
| <i>Plesionika ensis</i> (A. Milne-Edwards, 1881)                  | HBG7840      | MZ707247 | N/A      | GOM      |
| <i>Plesionika ensis</i> (A. Milne-Edwards, 1881)                  | HBG9264      | MZ702635 | N/A      | GOM      |
| <i>Plesionika ensis</i> (A. Milne-Edwards, 1881)                  | HBG6825      | MZ678645 | N/A      | GOM      |
| <i>Plesionika ensis</i> (A. Milne-Edwards, 1881)                  | HBG7995      | MZ680616 | MZ681521 | GOM      |
| <i>Plesionika ensis</i> (A. Milne-Edwards, 1881)                  | HBG4914      | MF197210 | N/A      | GOM      |
| <i>Plesionika richardi</i> (Coutière, 1905)                       | HBG3634      | N/A      | MT434001 | GOM      |

Family Pasiphaeidae Dana, 1852

***Pasiphaea*** Savigny, 1816

|                                                                  |         |          |          |     |
|------------------------------------------------------------------|---------|----------|----------|-----|
| <i>Pasiphaea merriami</i> Schmitt, 1931                          | HBG4171 | MF197215 | N/A      | GOM |
| <b><i>Eupasiphae</i></b> Wood-Mason in Wood-Mason & Alcock, 1893 |         |          |          |     |
| <i>Eupasiphae serrata</i> (Rathbun, 1902)                        | HBG4189 | MT436757 | MT444887 | GOM |

*Suborder Dendrobranchiate Spence Bate, 1888*

Family Aristeidae Wood-Mason in Wood-Mason & Alcock, 1891

***Hemipenaeus*** Spence Bate, 1881

*Hemipenaeus carpenteri* Wood-Mason in Wood-Mason & Alcock, 1891

|                                                                                 |         |          |     |     |
|---------------------------------------------------------------------------------|---------|----------|-----|-----|
| <i>Hemipenaeus carpenteri</i> Wood-Mason in Wood-Mason & Alcock, 1891           | HBG6846 | MZ678770 | N/A | GOM |
| <i>Hemipenaeus carpenteri</i> Wood-Mason in Wood-Mason & Alcock, 1891           | HBG6854 | MZ678933 | N/A | GOM |
| <i>Hemipenaeus carpenteri</i> Wood-Mason in Wood-Mason & Alcock, 1891           | HBG7867 | MZ702562 | N/A | GOM |
| <i>Hemipenaeus carpenteri</i> Wood-Mason in Wood-Mason & Alcock, 1891           | HBG7552 | MZ702555 | N/A | GOM |
| <i>Hemipenaeus carpenteri</i> Wood-Mason in Wood-Mason & Alcock, 1891 (Genbank) |         |          |     |     |

***Hepomadus*** Spence Bate, 1881

|                                              |         |          |     |         |
|----------------------------------------------|---------|----------|-----|---------|
| <i>Hepomadus glacialis</i> Spence Bate, 1881 | BE1-16S | LC466634 | N/A | Pacific |
|----------------------------------------------|---------|----------|-----|---------|

***Plesiopenaeus*** Spence Bate, 1881

|                                         |         |          |     |     |
|-----------------------------------------|---------|----------|-----|-----|
| <i>Cerataspis monstrosus</i> Gray, 1828 | HBG9204 | MZ702780 | N/A | GOM |
| <i>Cerataspis monstrosus</i> Gray, 1828 | KC6217  | JX403855 | N/A | GOM |

Family Benthescymidae Wood-Mason in Wood-Mason & Alcock, 1891

***Gennadas*** Spence Bate, 1881

|                                      |         |          |     |     |
|--------------------------------------|---------|----------|-----|-----|
| <i>Gennadas valens</i> (Smith, 1884) | HBG4765 | MT340799 | N/A | GOM |
|--------------------------------------|---------|----------|-----|-----|

***Bentheogennema*** Burkenroad, 1936

|                                                      |         |          |     |     |
|------------------------------------------------------|---------|----------|-----|-----|
| <i>Bentheogennema intermedia</i> (Spence Bate, 1888) | HBG4846 | MF197221 | N/A | GOM |
|------------------------------------------------------|---------|----------|-----|-----|

Family Penaeidae Rafinesque, 1815

***Funchalia*** J.Y. Johnson, 1868

|                                          |         |          |          |     |
|------------------------------------------|---------|----------|----------|-----|
| <i>Funchalia villosa</i> (Bouvier, 1905) | HBG6885 | MZ678932 | MZ681539 | GOM |
| <i>Funchalia villosa</i> (Bouvier, 1905) | HBG7941 | MZ702561 | MZ702648 | GOM |
| <i>Funchalia villosa</i> (Bouvier, 1905) | HBG6776 | N/A      | MZ681494 | GOM |
| <i>Funchalia villosa</i> (Bouvier, 1905) | HBG6796 | MH542999 | MH572634 | GOM |

Family Sergestidae Dana, 1852

***Neosergestes*** Judkins & Kensley, 2008

|                                              |         |          |          |            |
|----------------------------------------------|---------|----------|----------|------------|
| <i>Neosergestes edwardsii</i> (Krøyer, 1855) | HBG8243 | MH542882 | MT447454 | FL Straits |
|----------------------------------------------|---------|----------|----------|------------|

***Parasergestes*** Judkins & Kensley, 2008

|                                               |         |          |          |     |
|-----------------------------------------------|---------|----------|----------|-----|
| <i>Parasergestes vigilax</i> (Stimpson, 1860) | HBG8248 | MT444420 | MT447455 | GOM |
|-----------------------------------------------|---------|----------|----------|-----|

***Allosergestes*** Judkins & Kensley, 2008

|                                              |         |          |          |            |
|----------------------------------------------|---------|----------|----------|------------|
| <i>Allosergestes pectinatus</i> (Sund, 1920) | HBG8311 | MH542994 | MT447404 | FL Straits |
|----------------------------------------------|---------|----------|----------|------------|

***Deosergestes*** Judkins & Kensley, 2008

|                                               |         |          |          |     |
|-----------------------------------------------|---------|----------|----------|-----|
| <i>Deosergestes corniculum</i> (Krøyer, 1855) | HBG4676 | MF197225 | MF197258 | GOM |
|-----------------------------------------------|---------|----------|----------|-----|

***Sergestes*** H. Milne-Edwards, 1830a

|                                                     |         |          |          |            |
|-----------------------------------------------------|---------|----------|----------|------------|
| <i>Sergestes atlanticus</i> H. Milne-Edwards, 1830a | HBG8254 | MT444422 | MT447467 | FL Straits |
|-----------------------------------------------------|---------|----------|----------|------------|

***Gardinerosergia*** Vereshchaka, Olesen & Lunina, 2014

|                                               |         |          |          |            |
|-----------------------------------------------|---------|----------|----------|------------|
| <i>Gardinerosergia splendens</i> (Sund, 1920) | HBG7455 | MT444421 | MT444899 | FL Straits |
|-----------------------------------------------|---------|----------|----------|------------|

***Challengerosergia*** Vereshchaka, Olesen & Lunina, 2014

|                                                    |         |          |          |     |
|----------------------------------------------------|---------|----------|----------|-----|
| <i>Challengerosergia talismani</i> (Barnard, 1947) | HBG6810 | MT436759 | MT444889 | GOM |
|----------------------------------------------------|---------|----------|----------|-----|

***Phorcosergia*** Vereshchaka, Olesen & Lunina, 2014

|                                          |         |          |          |     |
|------------------------------------------|---------|----------|----------|-----|
| <i>Phorcosergia grandis</i> (Sund, 1920) | HBG4328 | MH543003 | MH572642 | GOM |
|------------------------------------------|---------|----------|----------|-----|

***Robustosergia*** Vereshchaka, Olesen & Lunina, 2014

|                                             |         |          |          |     |
|---------------------------------------------|---------|----------|----------|-----|
| <i>Robustosergia regalis</i> (Gordon, 1939) | HBG7283 | MT436764 | MT444900 | GOM |
|---------------------------------------------|---------|----------|----------|-----|

Family Solenoceridae Wood-Mason in Wood-Mason & Alcock, 1891

***Hymenopenaeus*** Smith, 1882

|                                          |         |     |          |     |
|------------------------------------------|---------|-----|----------|-----|
| <i>Hymenopenaeus debilis</i> Smith, 1882 | HBG9313 | N/A | MT387297 | GOM |
|------------------------------------------|---------|-----|----------|-----|

***Mesopenaeus*** Perez Farfante, 1977

|                                               |         |          |          |     |
|-----------------------------------------------|---------|----------|----------|-----|
| <i>Mesopenaeus tropicalis</i> (Bouvier, 1905) | HBG5014 | MF197224 | MF197262 | GOM |
|-----------------------------------------------|---------|----------|----------|-----|

***Pleoticus*** Spence Bate, 1888

|                                         |      |          |          |           |
|-----------------------------------------|------|----------|----------|-----------|
| <i>Pleoticus robustus</i> (Smith, 1885) | Sp27 | KJ879273 | KJ879319 | Mediterr. |
|-----------------------------------------|------|----------|----------|-----------|

**Outgroup**

|                                                |        |           |          |          |
|------------------------------------------------|--------|-----------|----------|----------|
| <i>Pseudosquilla ciliata</i> (Fabricius, 1787) | 120882 | HM1388844 | HM138800 | Atlantic |
|------------------------------------------------|--------|-----------|----------|----------|

---
