# Supplementary figures and images for: A Mysterious World Revealed: Larval-Adult Matching of Deep-Sea Shrimps from the Gulf of Mexico
Source: MDPI journal article supplement (doi:10.3390/d13100457), 2021-09-23

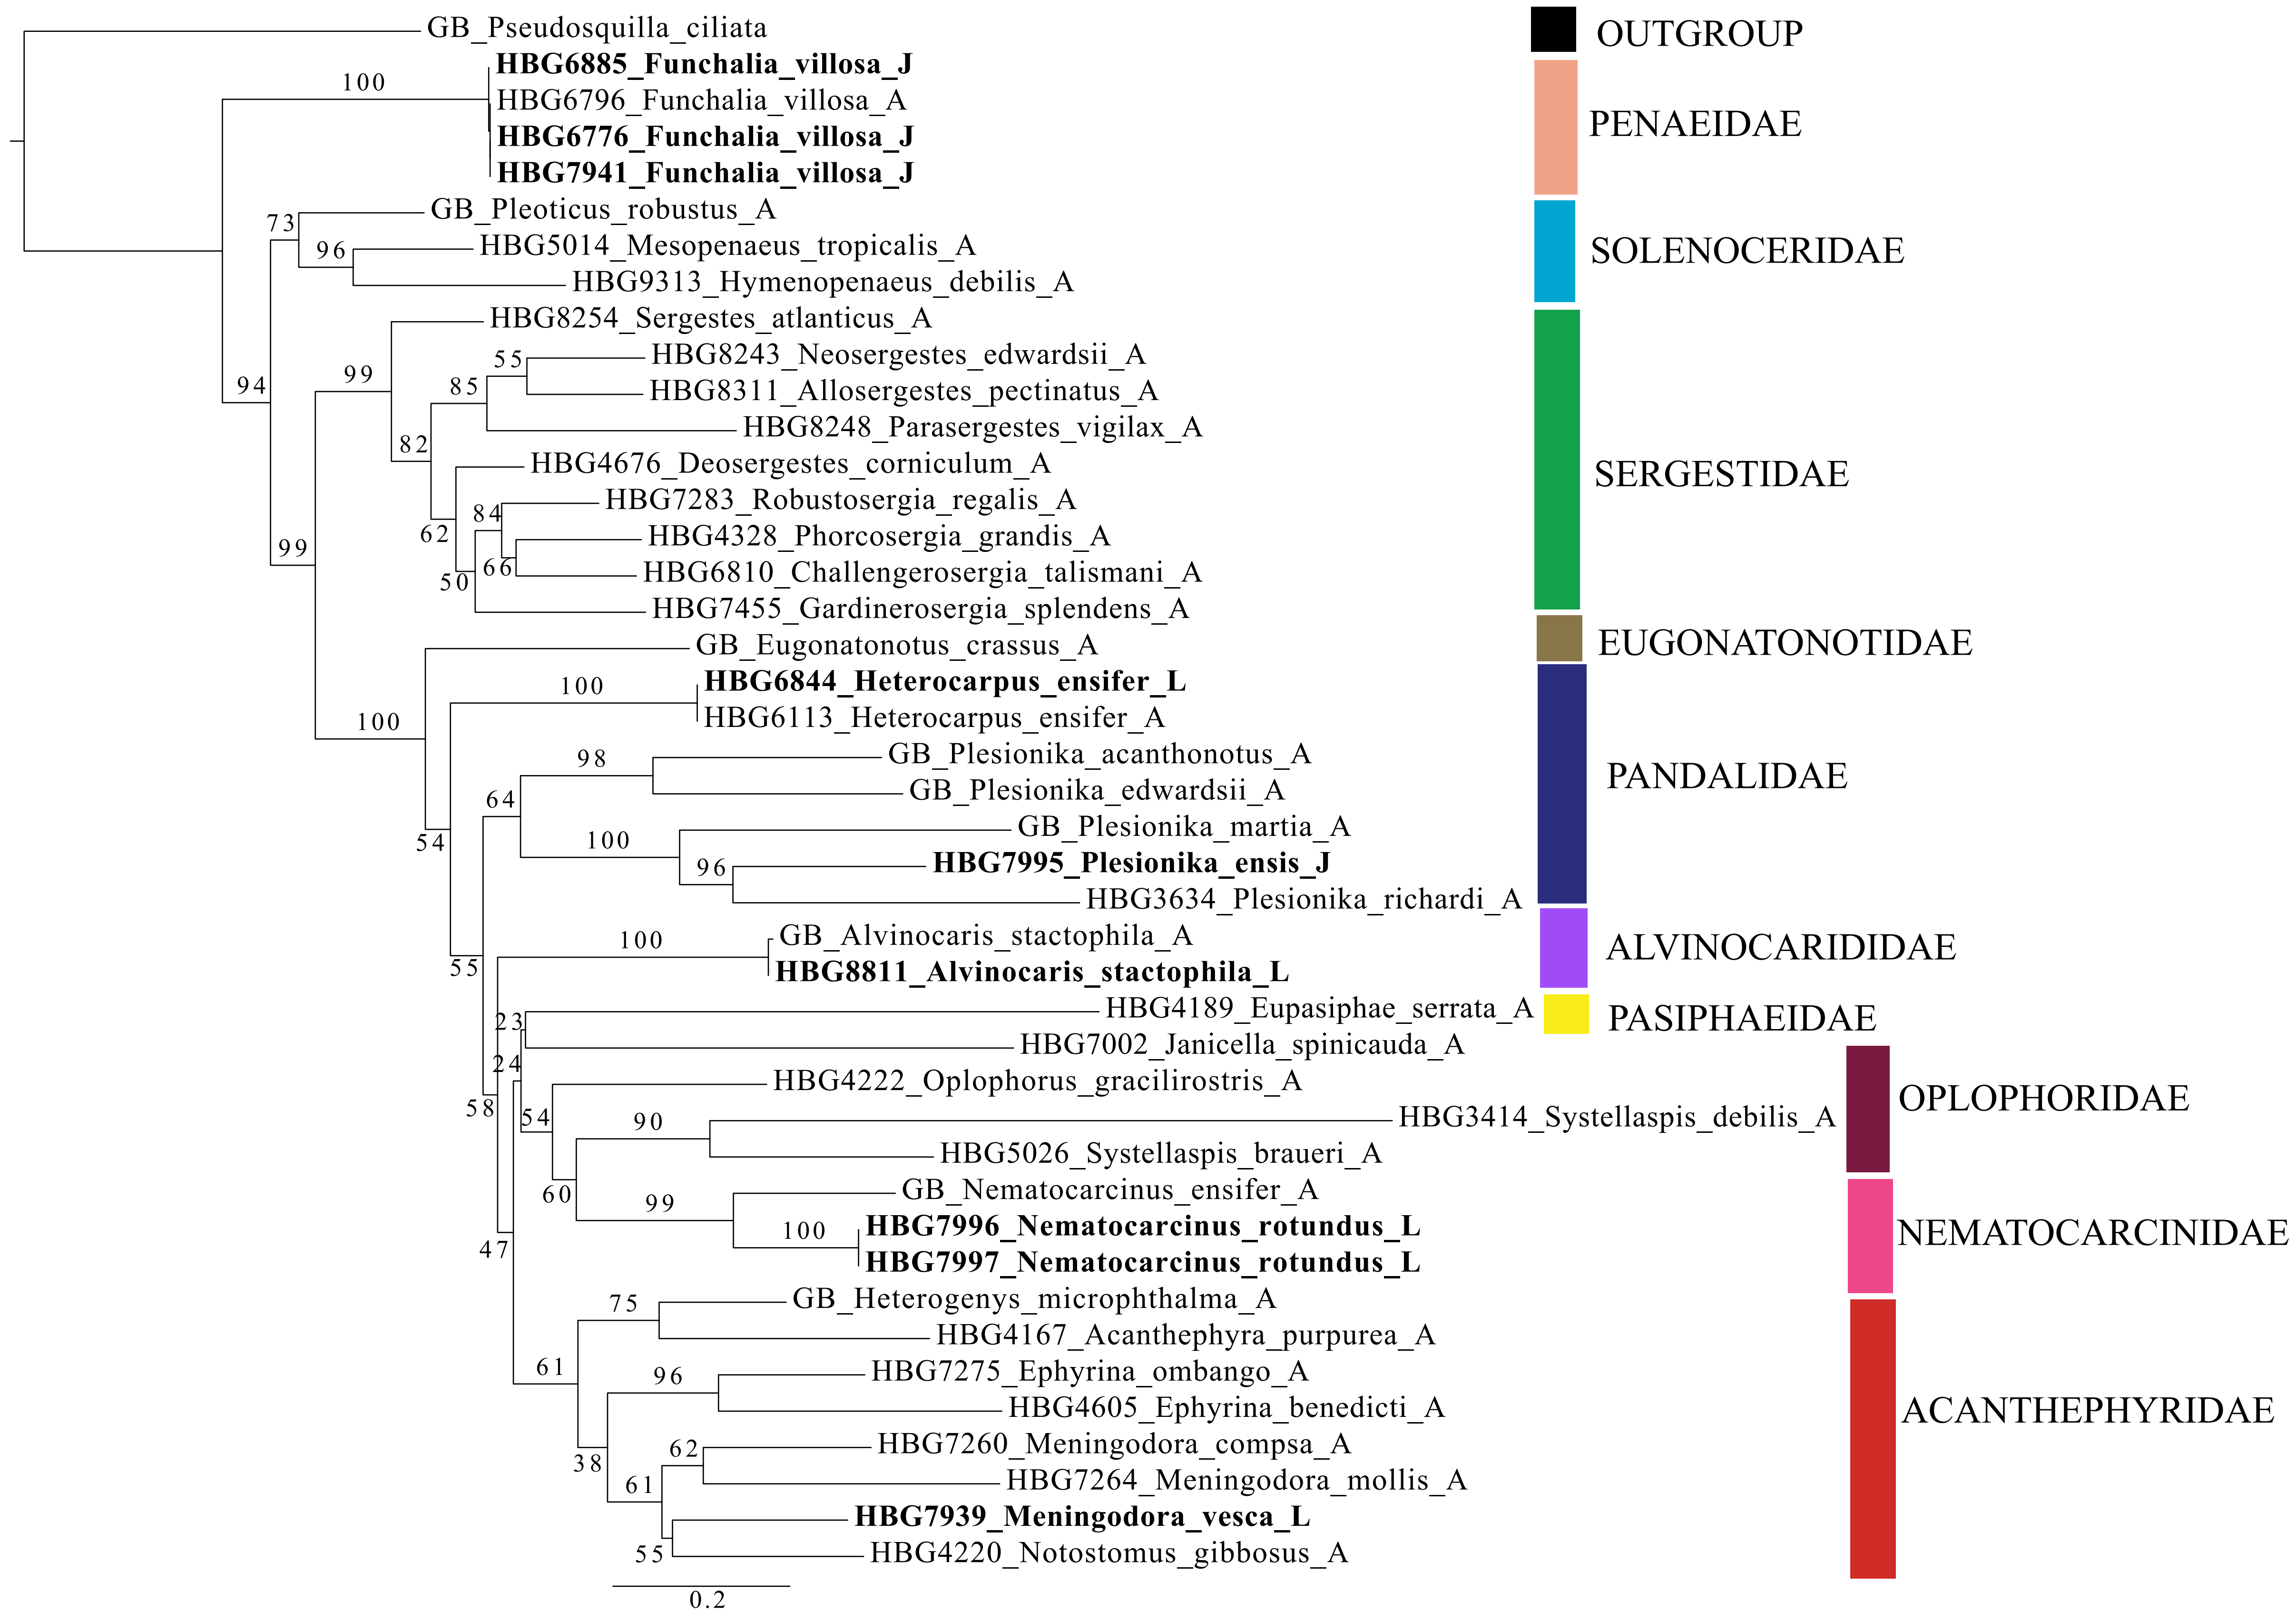

Supplement: s1 [file s1]

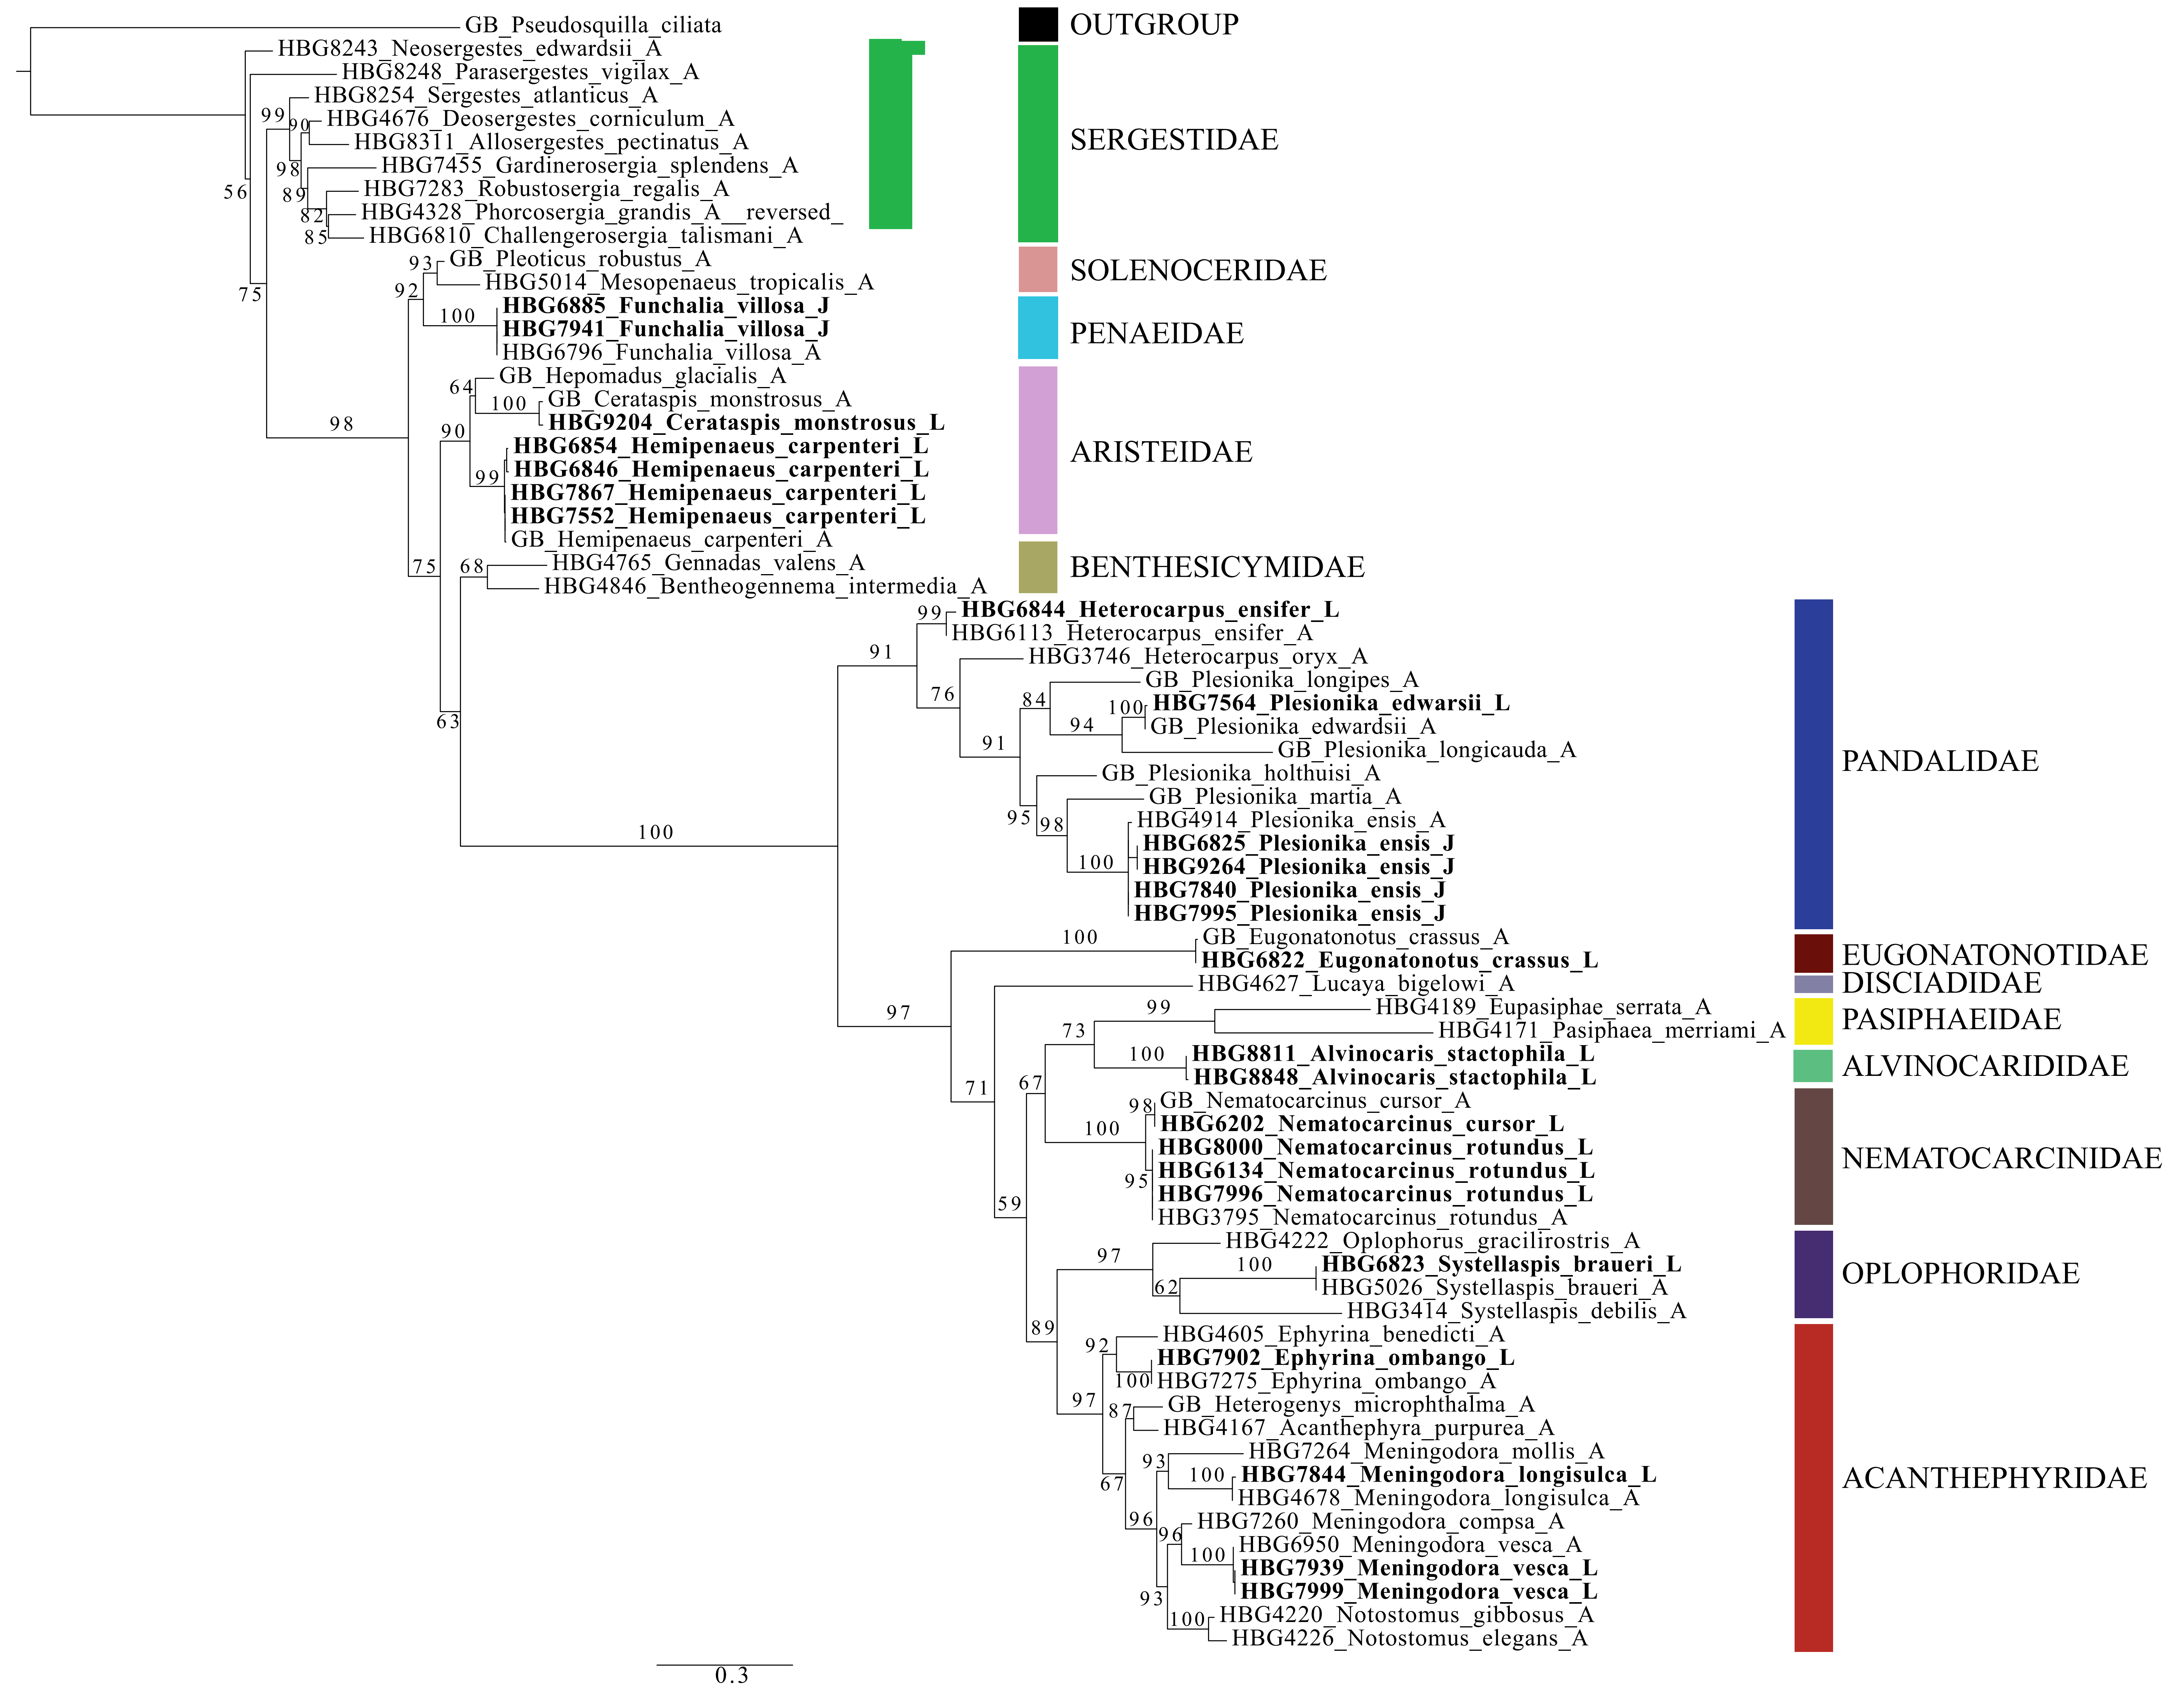

Supplement: s1 [file s1]
